# Supplementary material for: Cu-THQ-EFG Composite for Highly Selective Electrochemical CO2 Reduction to Formate at Low Overpotentials
Source: MDPI journal article supplement (doi:10.3390/polym14235112), 2022-11-24
Supplement: s1 [file s1]

Supplementary

# Cu-THQ-EFG Composite for Highly Selective Electrochemical CO<sub>2</sub> Reduction to Formate at Low Overpotentials

Lisha Jia, Klaudia Wagner, Jamie Smyth, David Officer, Jun Chen \* and Pawel Wagner \*

ARC Centre of Excellence for Electromaterials Science, Intelligent Polymer Research Institute, University of Wollongong, Wollongong, NSW 2522, Australia

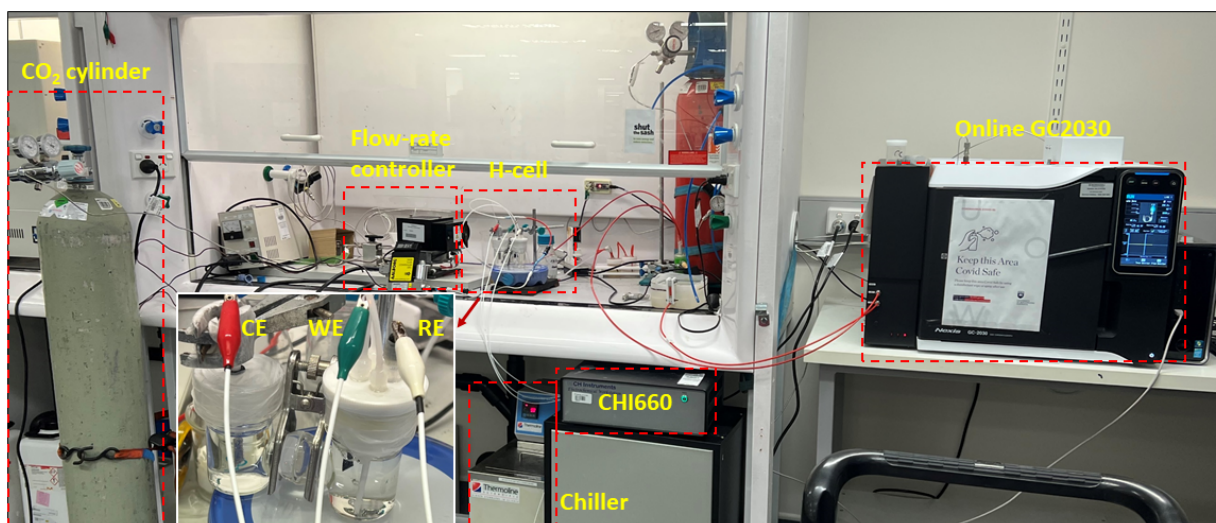

**Figure S1.** Digital image of the on-line gas analysis system employed for CO<sub>2</sub> electrocatalysis; insert is an enlarged image of the H-cell with two compartment.

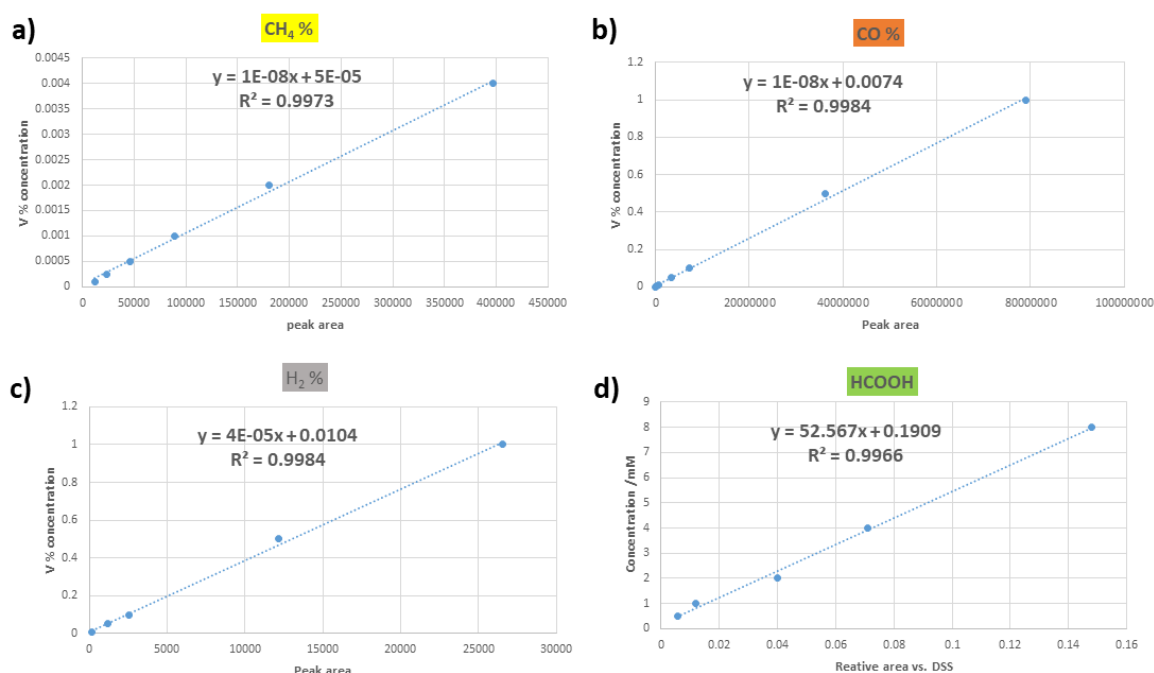

**Figure S2.** Calibration curve of gas product, a) CH<sub>4</sub>, b) CO and c) H<sub>2</sub> and liquid product, d) HCOOH in electrocatalysis.

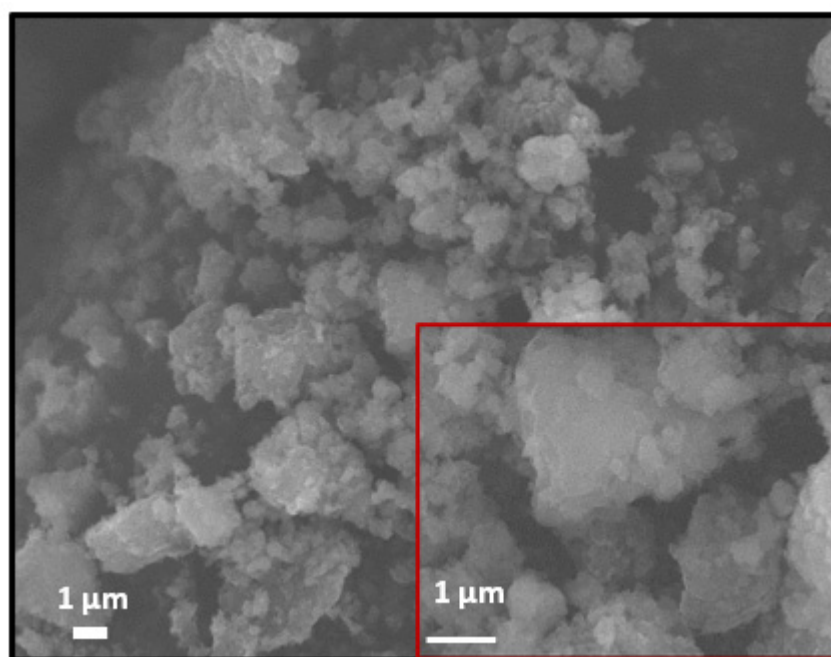

**Figure S3.** SEM images of Cu-THQ-GO composite.

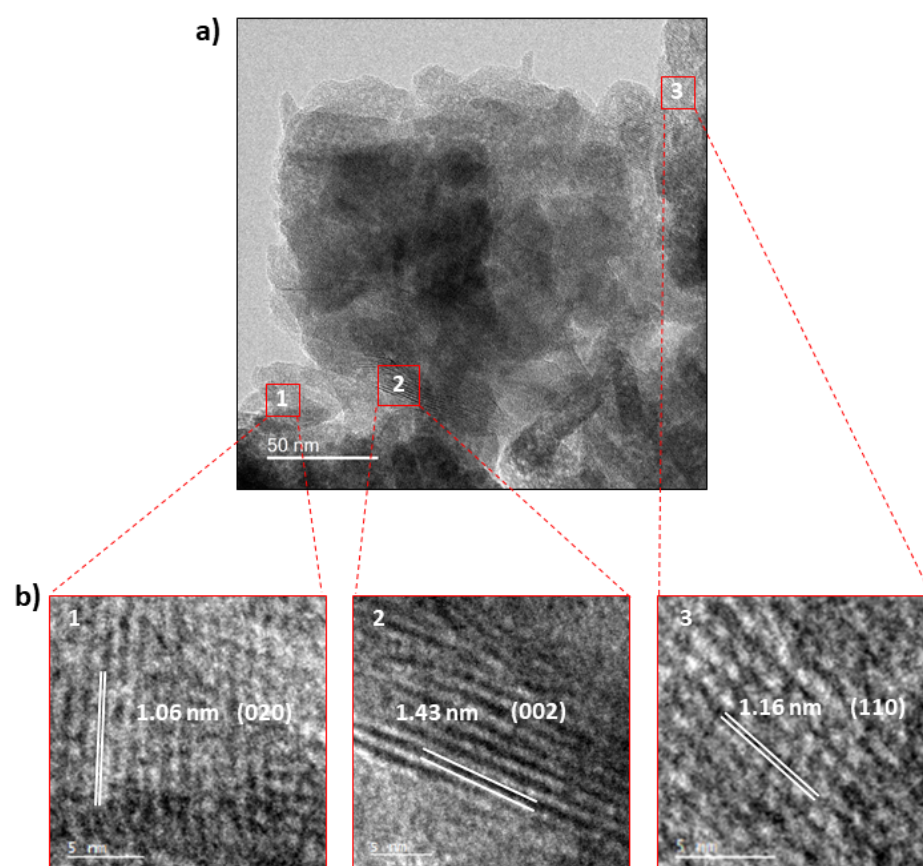

**Figure S4.** a) TEM image of Cu-THQ-EFG composite; b) enlarged TEM image of Cu-THQ phases in the composite.

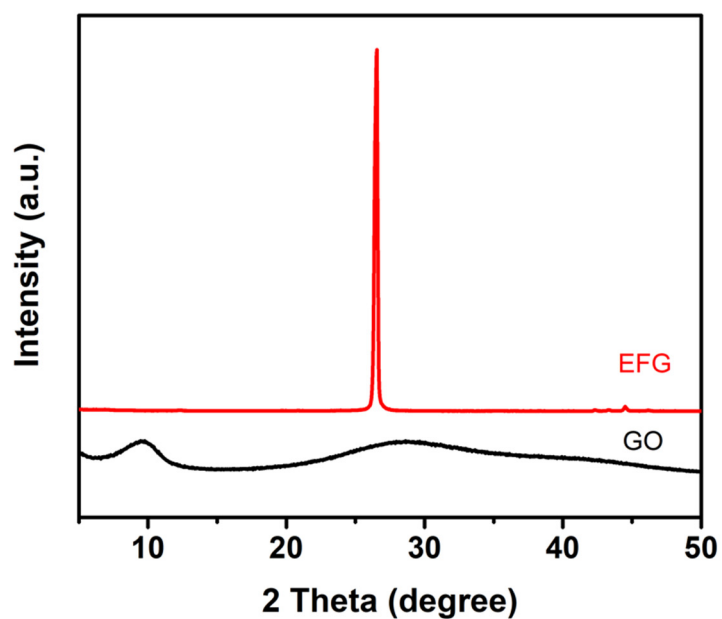

Figure S5. XRD curves of two substrate (GO and EFG).

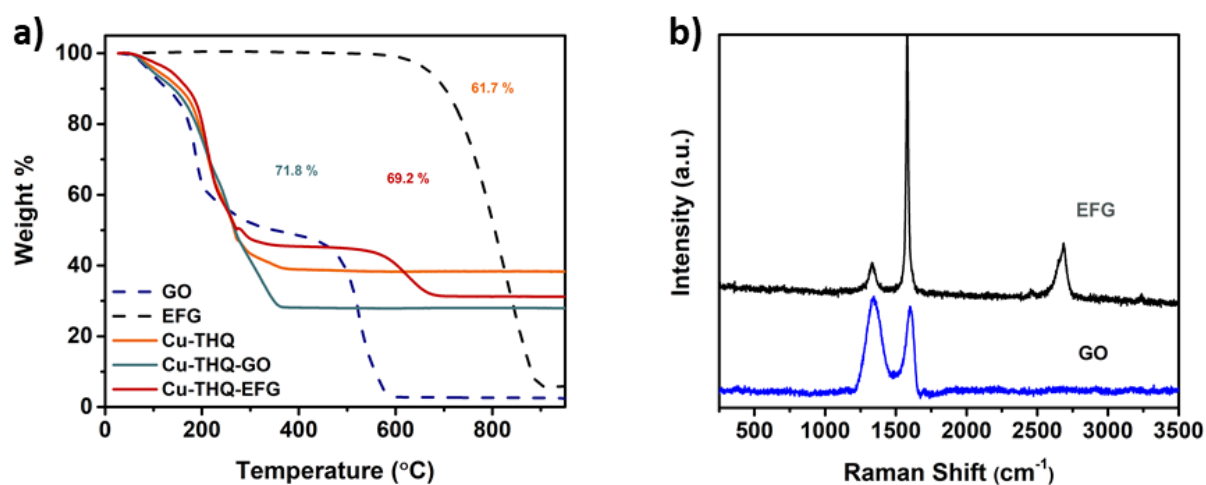

Figure S6. a) TGA curves of two substrate (GO and EFG) and three catalysts (Cu-THQ, Cu-THQ-GO and Cu-THQ-EFG), b) Raman spectrums of two substrate (GO and EFG).

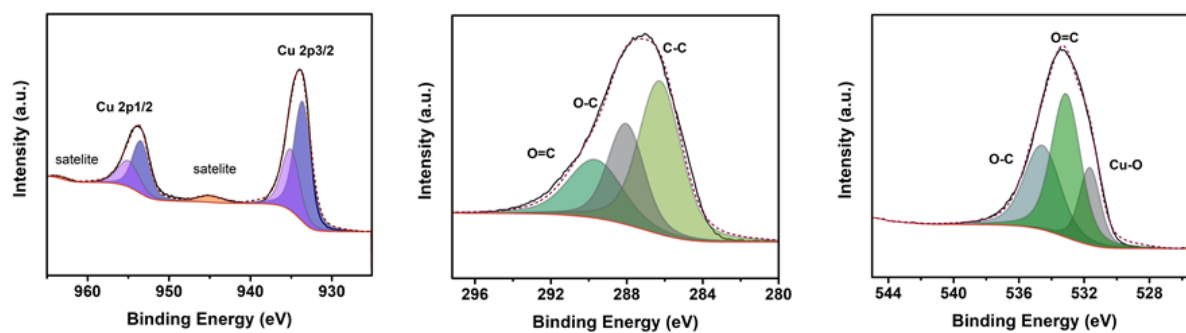

Figure S7. XPS of Cu-THQ.

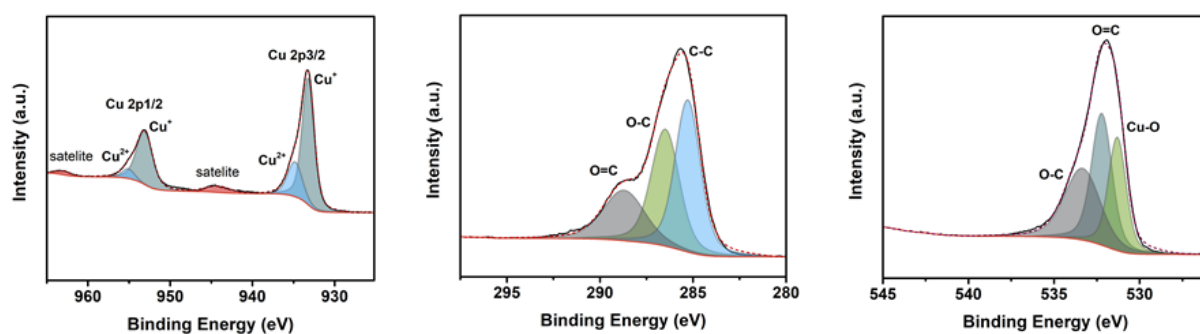

Figure S8. XPS of Cu-THQ-GO.

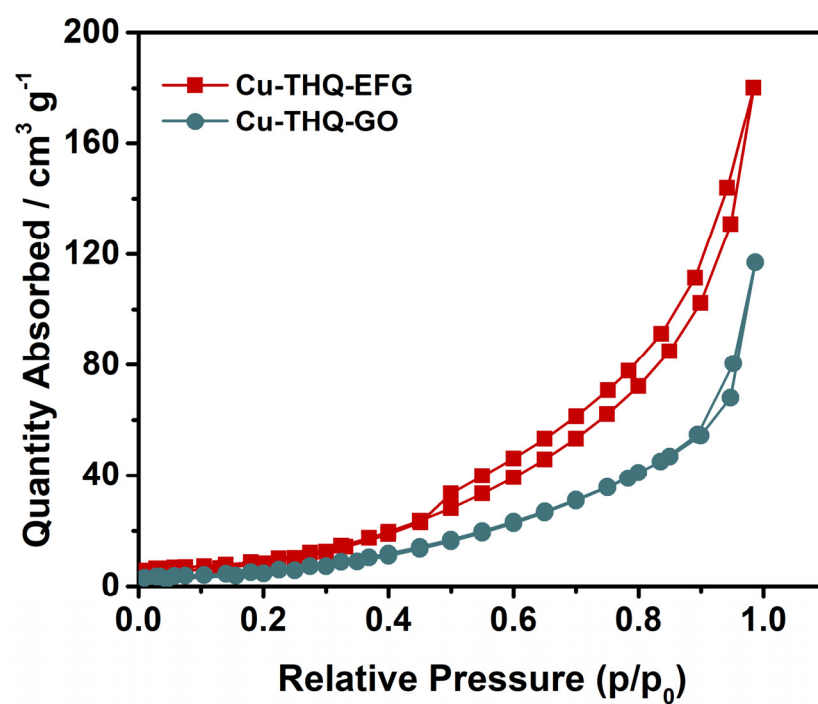Figure S9. N<sub>2</sub> sorption isotherms of Cu-THQ-GO and Cu-THQ-EFG composite.

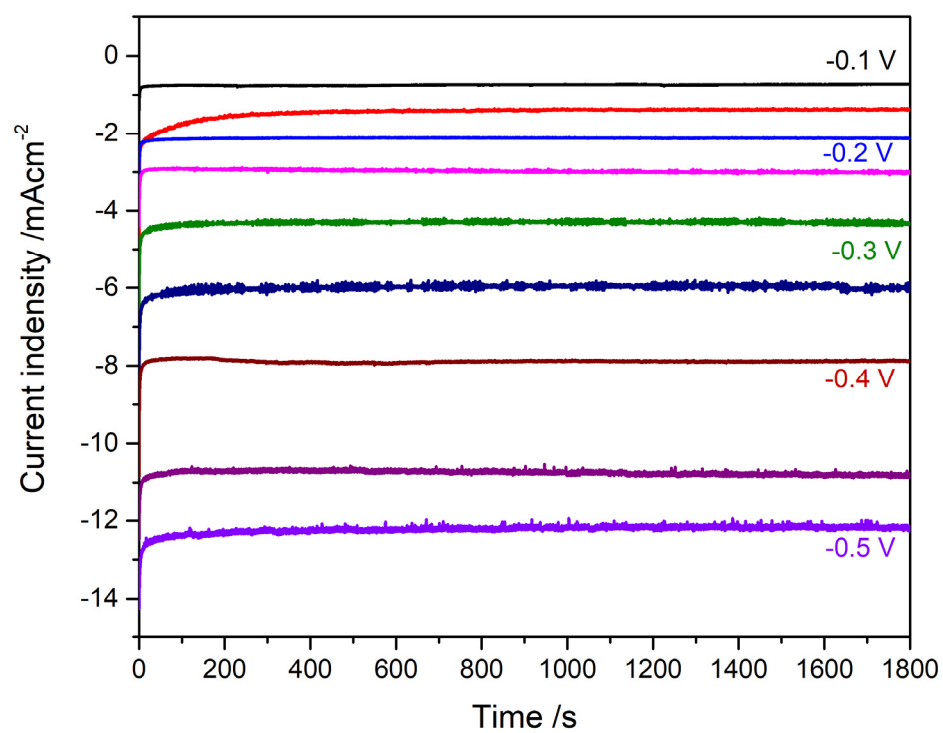

**Figure S10.** Controlled potential electrolysis (CPE) measurements at fixed potentials from -0.1 V to -0.5 V vs. RHE.

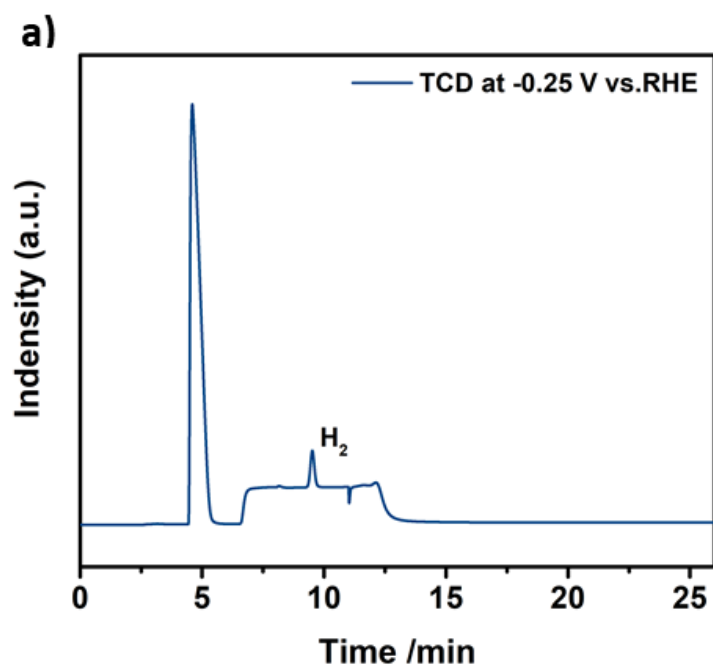

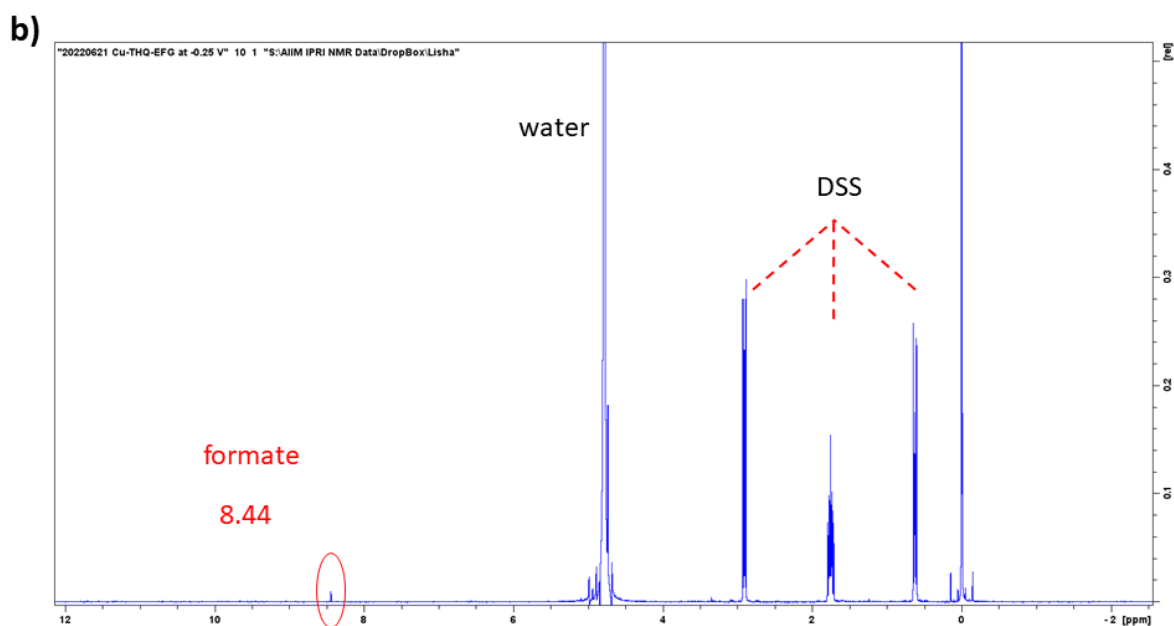

Figure S11. a) GC and b) NMR data of Cu-THQ-EFG at -0.25 V vs. RHE.

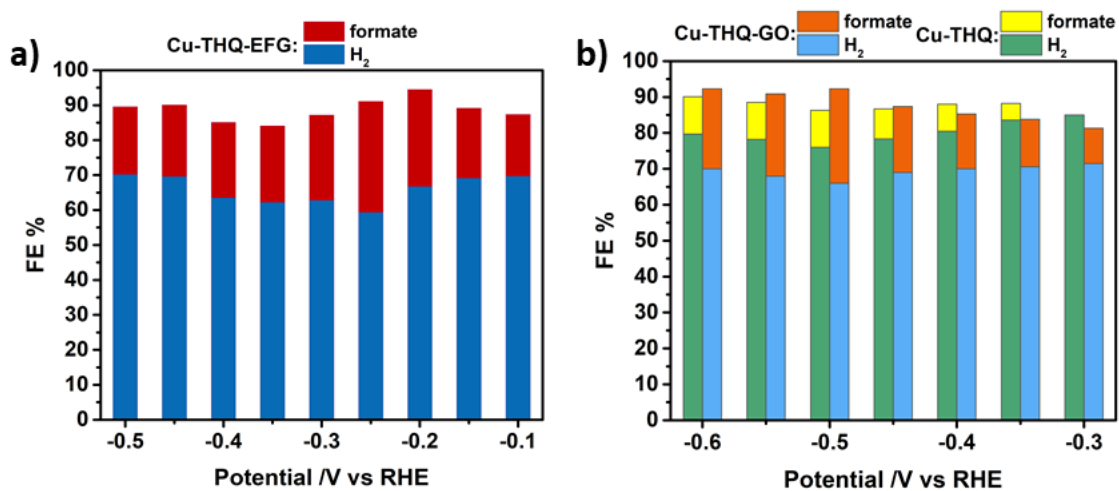

Figure S12. a) Faradaic efficiency of H<sub>2</sub> and formate for Cu-THQ-EFG at fixed potentials from -0.1 V to -0.5 V vs RHE; b) Faradaic efficiency of H<sub>2</sub> and formate for Cu-THQ and Cu-THQ-GO at fixed potentials from -0.3 V to -0.6 V vs. RHE.
